# Supplementary material for: Orientation dependent interlayer stacking structure in bilayer MoS2domains
Source: Royal Society of Chemistry journal article supplement (doi:10.1039/c7nr03198j), 2017-01-01
Supplement: c7nr03198j1.pdf [file c7nr03198j1.pdf]

# Supporting information

## Orientation Dependent Interlayer Stacking

### Structure in Bilayer MoS<sub>2</sub> domains

*Shanshan Wang<sup>1</sup>, Hidetake Sawada<sup>1,2,3</sup>, Christopher S. Allen<sup>1,3</sup>, Angus I. Kirkland<sup>1,3</sup>, Jamie H.*

*Warner<sup>1\*</sup>*

<sup>1</sup>Department of Materials, University of Oxford, Parks Road, Oxford, OX1 3PH, United Kingdom

<sup>2</sup>JEOL Ltd., 3-1-2 Musashino, Akishima, Tokyo 196-8558, Japan

<sup>3</sup>Electron Physical Sciences Imaging Center, Diamond Light Source Ltd, Didcot, Oxfordshire, OX11 0DE, United Kingdom

[\\*Jamie.warner@materials.ox.ac.uk](mailto:Jamie.warner@materials.ox.ac.uk);

**S1. Atomic models with corresponding ADF-STEM simulations and intensity measurements for Mo zigzag step edges and 100% S-covered Mo Klein step edges in AA' stacked bilayer MoS<sub>2</sub>**

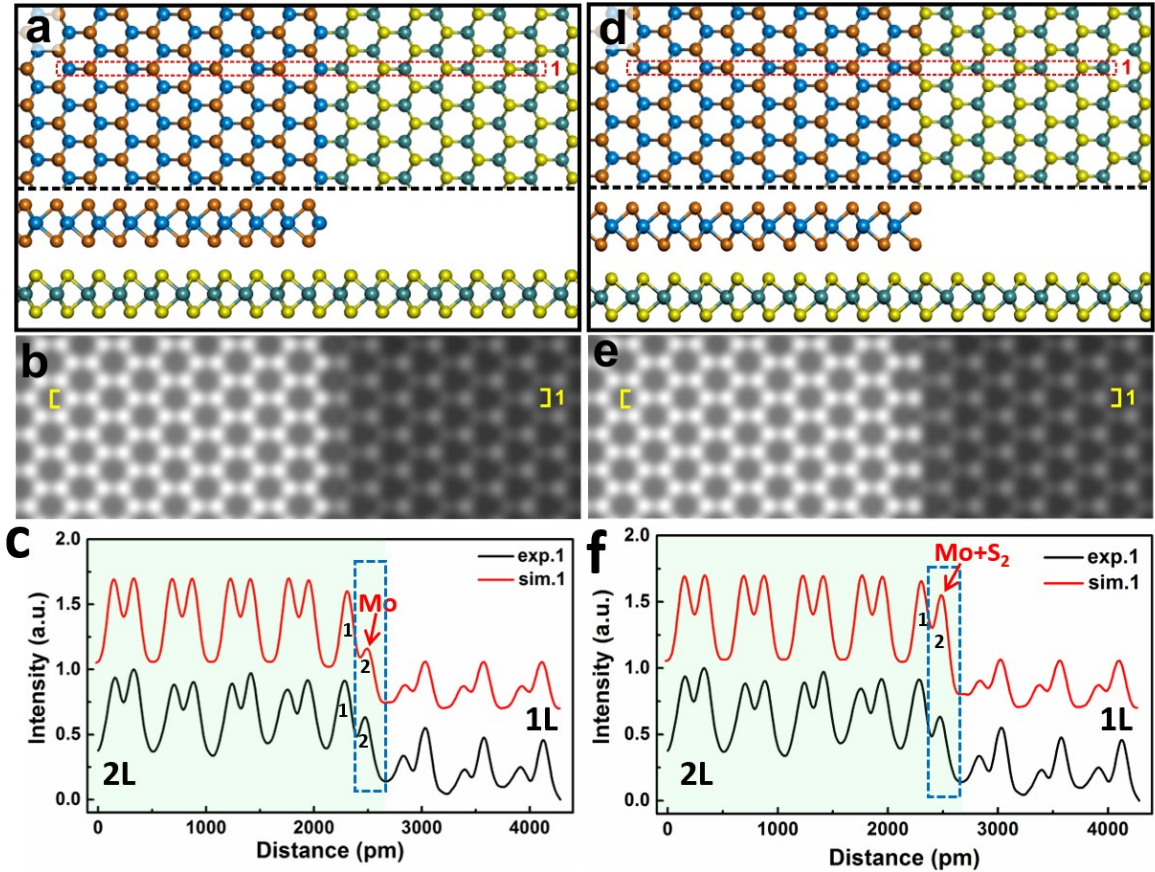

**Figure S1.** (a) Atomic model of one possible 2<sup>nd</sup>-layer MoS<sub>2</sub> step edge configuration having a Mo-terminated zigzag edge. (b) Multislice ADF-STEM image simulations based on the atomic model in (a) (see simulation parameters in Methods). (c) Intensity line profiles across the step edge region marked 1 in the experimental image in figure 2c and the simulated image in panel (b) of this figure, respectively. (d) Atomic model of an alternative 2<sup>nd</sup>-layer MoS<sub>2</sub> step edge configuration having a 100% S-covered Mo Klein edge. (b) Multislice ADF-STEM image simulations based on the atomic model in (d). (c) Intensity line profiles across the step edge region marked 1 in the experimental image in Figure 2c and the simulated image in panel (e) of this figure, respectively.

We also constructed atomic models for another two possible 2<sup>nd</sup>-layer step edge configurations in the AA' stacked bilayer MoS<sub>2</sub> and used these to calculate additional ADF-STEM image simulations. One model is a Mo-terminated zigzag edge and the other is 100% S-covered Mo Klein edge, as shown in Figures S1 a and d. It can be seen that the intensity profiles at the step edge region for simulated images corresponding to these two models do not match those the experimental image, as indicated by the blue dashed boxes in Figures S1 c and f. The ratio of

intensity between peak 1 and 2 for the image simulation in Figure 3c and 3f are measured to be 1: 0.51 and 1: 0.89, both of which are not consistent with the intensity ratio between these two peaks in the experimental image, which is 1: 0.68. Therefore, these models are excluded as candidates for step edge structures for AA' stacked bilayer MoS<sub>2</sub>. The intensity ratio between these two peaks for the image simulation in Figure 2f is 1:0.69, which agrees with experiments very well.

## S2. Statistical analysis of AA' and AB stacked MoS<sub>2</sub> second layers on monolayer MoS<sub>2</sub>

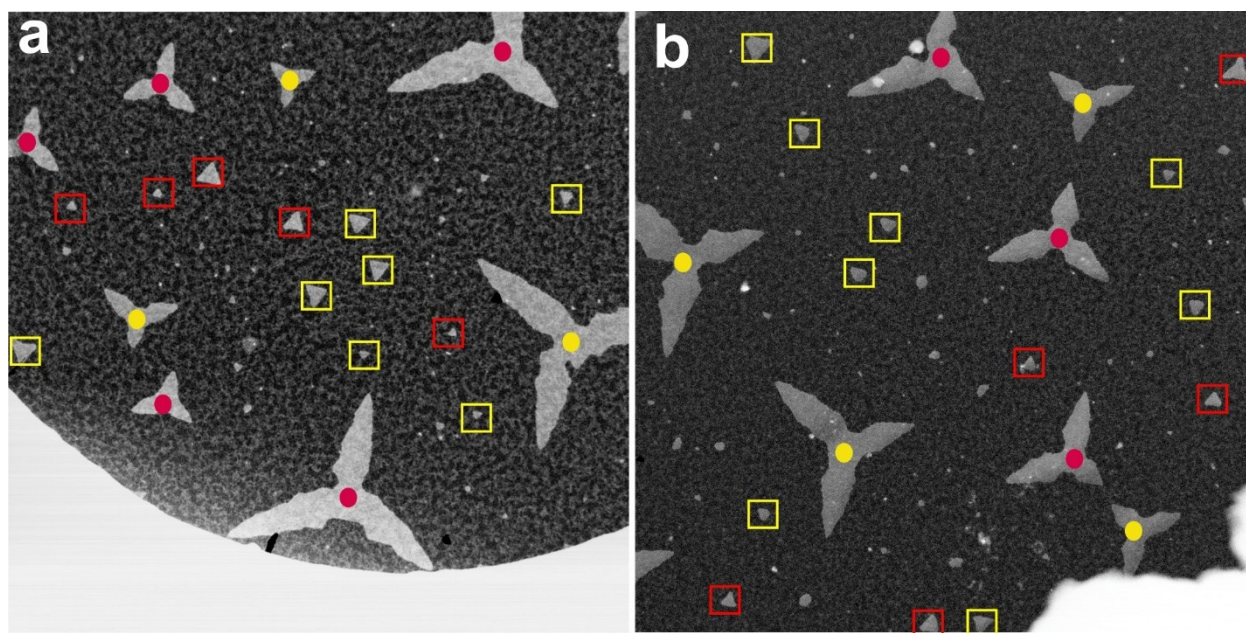

**Figure S2.** Low magnification ADF-STEM images used for the statistical analysis of domain orientations shown in Figure 4b. Red and yellow markers represent AA' and AB stacked bilayer MoS<sub>2</sub>, respectively, while dots and squares indicate the larger shuriken-shaped 2<sup>nd</sup>-layer domains and smaller nuclei, respectively.
